# Supplementary material for: Entanglement in Co(ii) coordination networks: polycatenation from single net to 2-fold and 3-fold interpenetrated nets
Source: Royal Society of Chemistry journal article supplement (doi:10.1039/c4ce02101k), 2014-11-25
Supplement: c4ce02101k1.pdf [file c4ce02101k1.pdf]

## Supporting Information

### **Entanglement in Co(II) coordination networks: polycatenation from single net to 2-fold and 3-fold interpenetrated nets**

Tsung-Tai Wu, Wayne Hsu, Xiang-Kai Yang and Jhy-Der Chen\*

*Department of Chemistry, Chung Yuan Christian University, Chung-Li,  
Taiwan, R.O.C.*

**Fig. S1.** The TGA curves of complexes **1 – 4** and **6**.

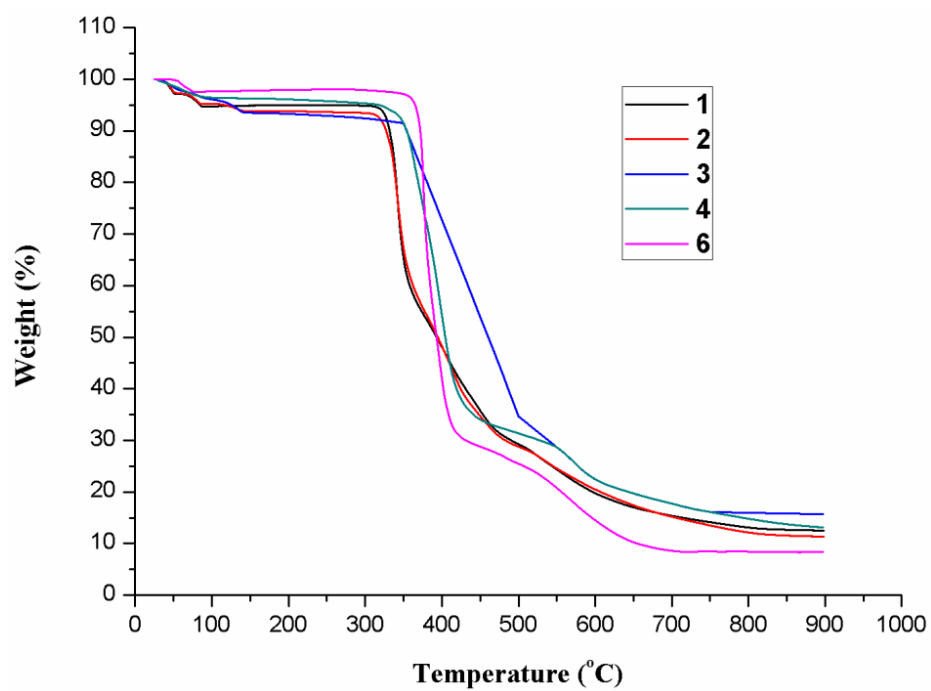

**Fig. S2.** Simulated (black) and as synthesized (red) PXRD patterns of complex **1**, and the pattern (blue) of the compound heated at 150 °C for 3hr.

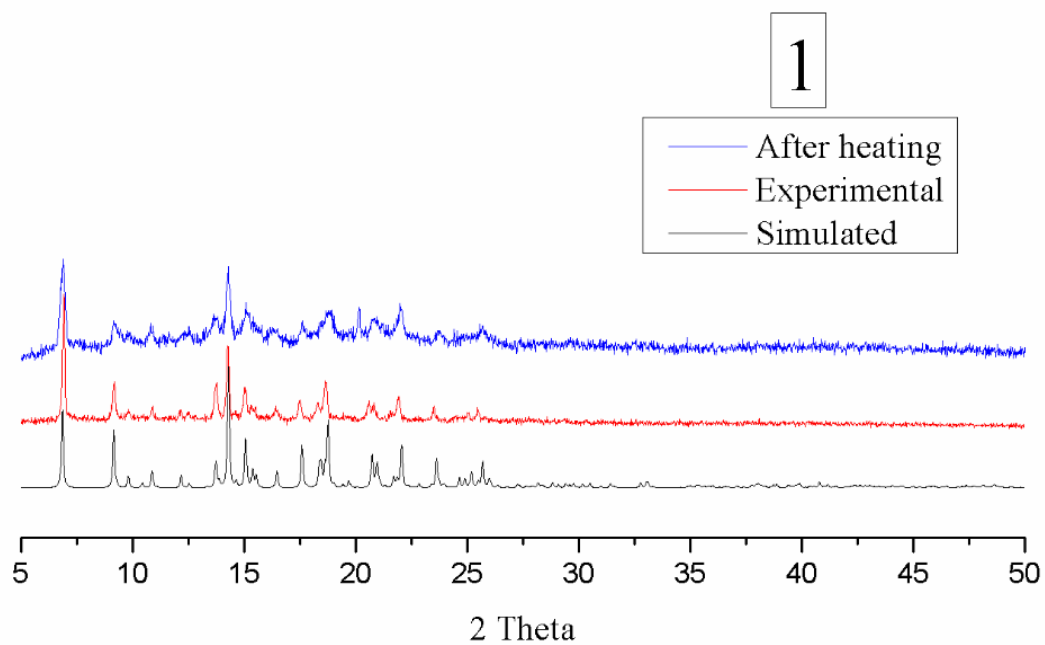

**Fig. S3.** Simulated (black) and as synthesized (red) PXRD patterns of complex **2**, and the pattern (blue) of the compound heated at 150 °C for 3hr.

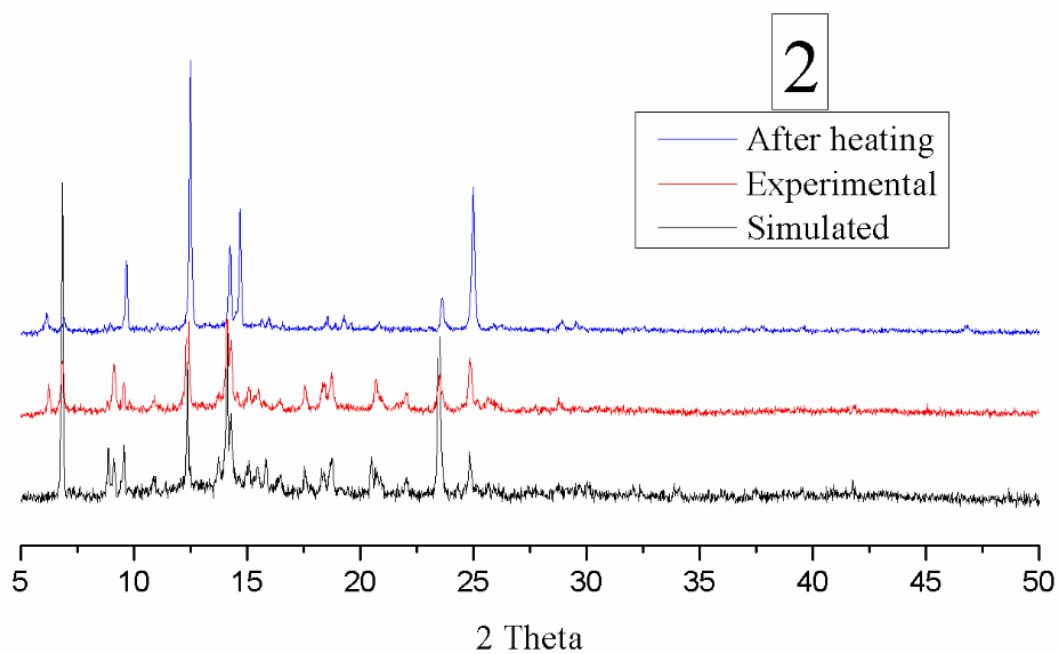

**Fig. S4.** Simulated (black) and as synthesized (red) PXRD patterns of complex **3**, and the pattern (blue) of the compound heated at 150 °C for 3hr.

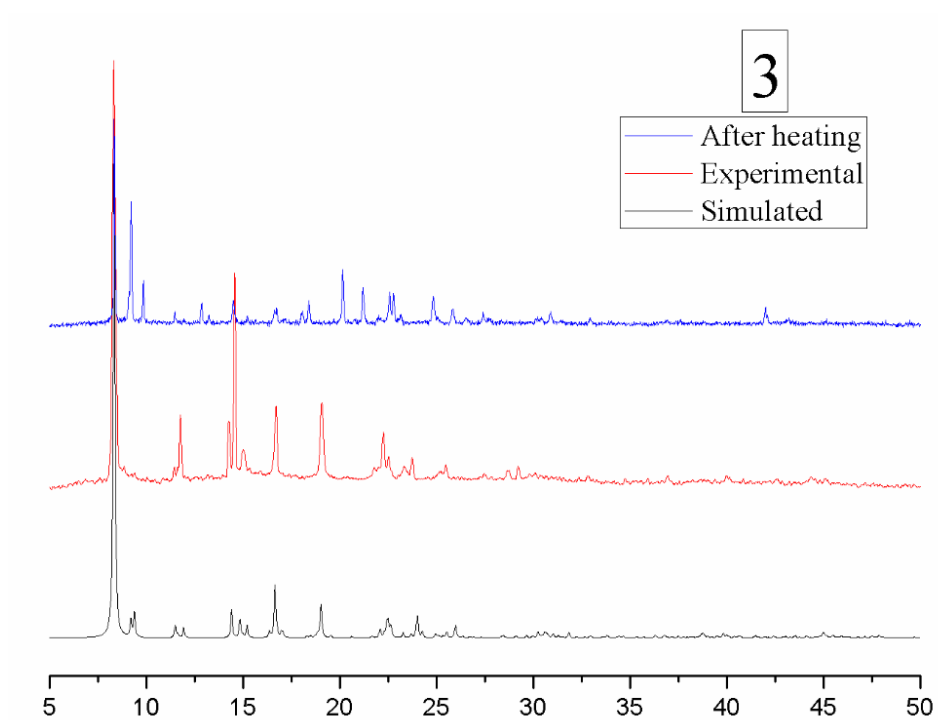

**Fig. S5.** Simulated (black) and as synthesized (red) PXRD patterns of complex **4**, and the pattern (blue) of the compound heated at 150 °C for 3hr.

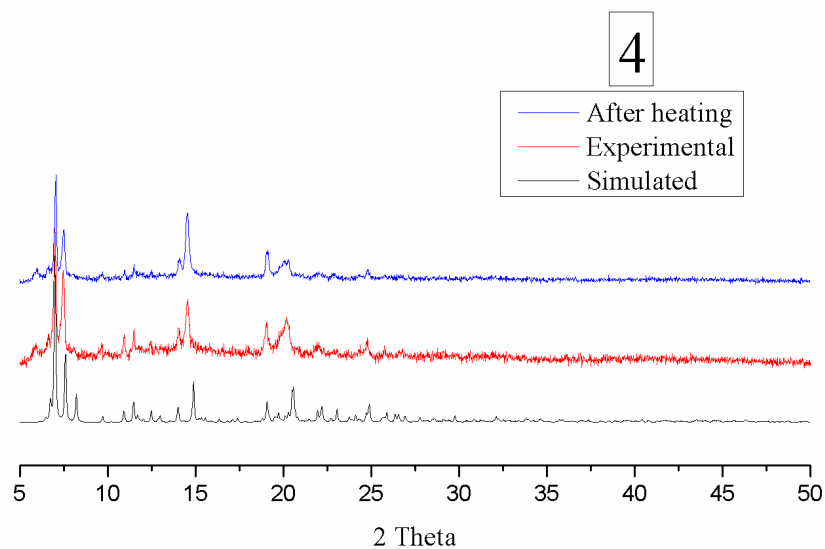

**Fig. S6.** Simulated (black) and as synthesized (red) PXRD patterns of complex **5**, and the pattern (blue) of the compound heated at 150 °C for 3hr.

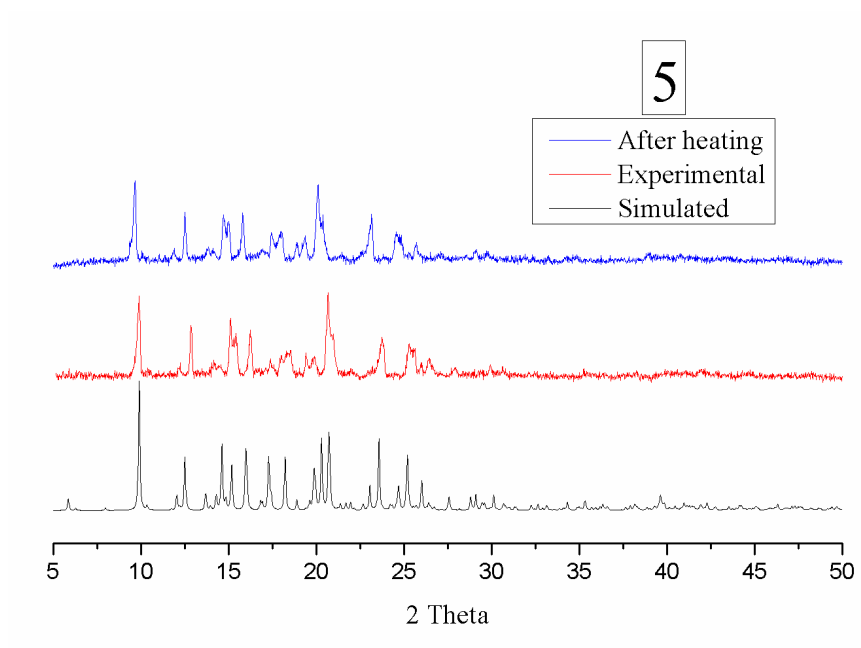

**Fig. S7.** Simulated (black) and as synthesized (red) PXRD patterns of complex **6**, and the pattern (blue) of the compound heated at 150 °C for 3hr.

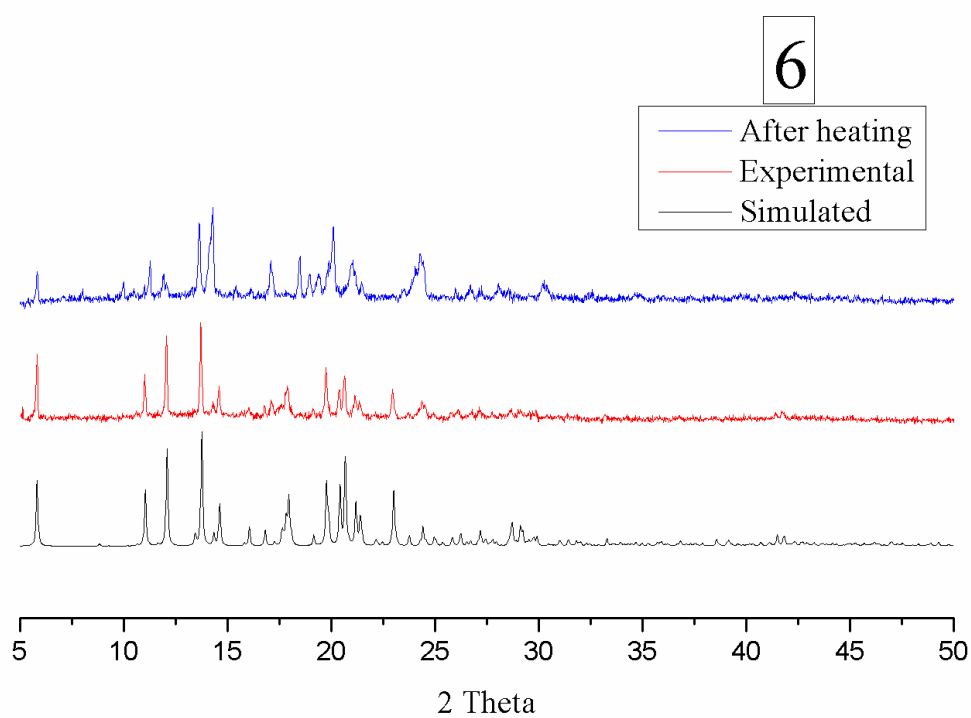



**Fig. S8.** (a) The adsorption isotherms for complex **4'**. (b) Isothermic heat of adsorption of **4'** at different CO<sub>2</sub> uptake amounts.

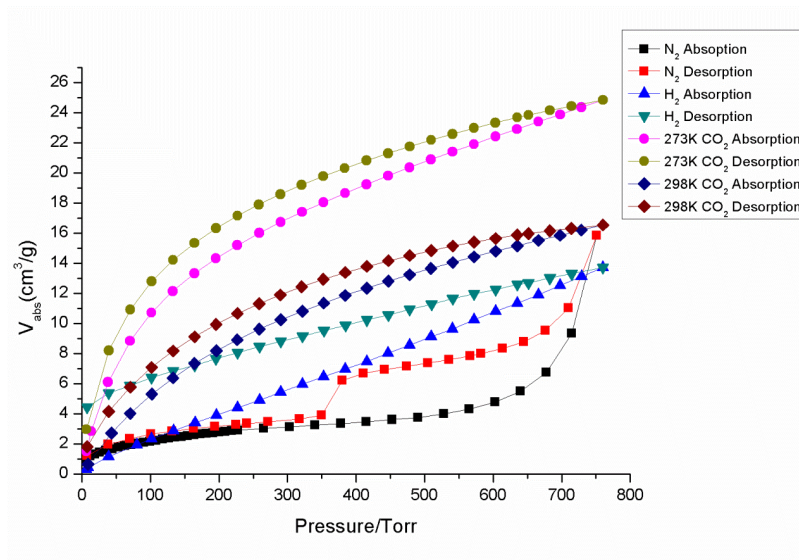

(a)

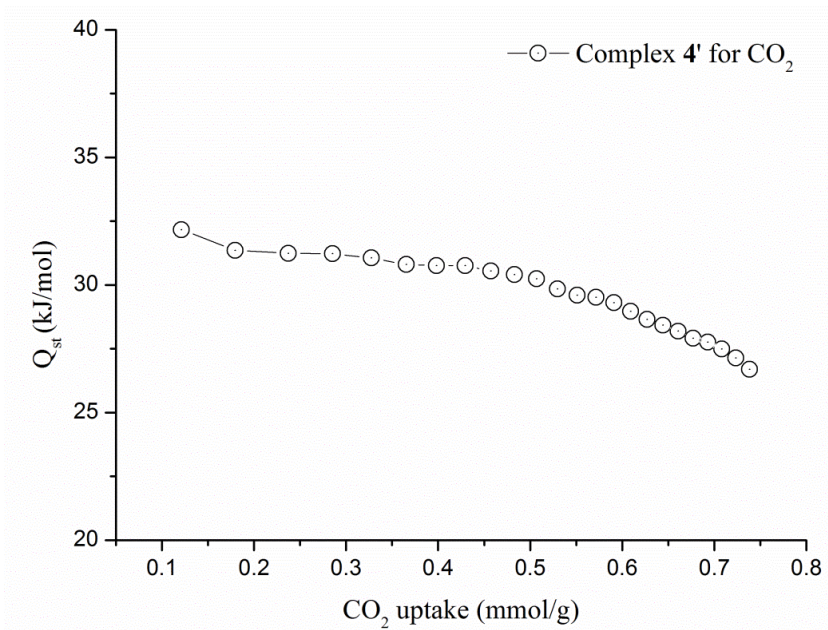

(b)

**Table S1.** Selected bond lengths (Å) and angles (°) for complex **1**.

---

|                |          |
|----------------|----------|
| Co-O(5B)       | 2.026(7) |
| Co-N(4A)       | 2.071(8) |
| Co-N(1)        | 2.079(8) |
| Co-O(4)        | 2.133(7) |
| Co-O(3)        | 2.186(7) |
| Co-O(6B)       | 2.332(7) |
| <br>           |          |
| O(5B)-Co-N(4A) | 101.9(3) |
| O(5B)-Co-N(1)  | 95.0(3)  |
| N(4A)-Co-N(1)  | 98.9(3)  |
| O(5B)-Co-O(4)  | 159.8(3) |
| N(4A)-Co-O(4)  | 92.8(3)  |
| N(1)-Co-O(4)   | 96.3(3)  |
| O(5B)-Co-O(3)  | 101.9(3) |
| N(4A)-Co-O(3)  | 150.7(3) |
| N(1)-Co-O(3)   | 95.7(3)  |
| O(4)-Co-O(3)   | 60.3(3)  |
| O(5B)-Co-O(6B) | 59.4(2)  |
| N(4A)-Co-O(6B) | 88.6(3)  |
| N(1)-Co-O(6B)  | 154.4(3) |
| O(4)-Co-O(6B)  | 107.8(3) |
| O(3)-Co-O(6B)  | 89.1(3)  |

---

Symmetry transformations used to generate equivalent atoms:

(A)  $-x, y + 1/2, -z + 3/2$  (B)  $x, y + 1, z$ .

**Table S2.** Selected bond lengths (Å) and angles (°) for complex **2**.

---

|                |            |
|----------------|------------|
| Co-O(3A)       | 2.0071(18) |
| Co-O(2)        | 2.0278(17) |
| Co-O(5D)       | 2.0362(18) |
| Co-N(1)        | 2.0543(17) |
| Co-O(4C)       | 2.0741(18) |
| <br>           |            |
| O(3A)-Co-O(2)  | 165.43(6)  |
| O(3A)-Co-O(5D) | 91.47(8)   |
| O(2)-Co-O(5D)  | 88.45(7)   |
| O(3A)-Co-N(1)  | 98.56(7)   |
| O(2)-Co-N(1)   | 95.57(7)   |
| O(5D)-Co-N(1)  | 104.29(7)  |
| O(3A)-Co-O(4C) | 87.05(8)   |
| O(2)-Co-O(4C)  | 89.26(7)   |
| O(5D)-Co-O(4C) | 164.97(6)  |
| N(1)-Co-O(4C)  | 90.72(7)   |

---

Symmetry transformations used to generate equivalent atoms:

(A)  $-x + 1, -y + 1, -z + 1$  (B)  $-x + 2, -y + 1, -z + 3$  (C)  $x + 1, y, z$   
(D)  $-x, -y + 1, -z + 1$  (E)  $x - 1, y, z - 2$ .

**Table S3.** Selected bond lengths (Å) and angles (°) for complex **3**.

---

|                 |            |
|-----------------|------------|
| Co-O(3A)        | 2.001(2)   |
| Co-O(2)         | 2.002(2)   |
| Co-N(1)         | 2.059(2)   |
| Co-O(4D)        | 2.066(2)   |
| Co-O(5B)        | 2.1889(19) |
|                 |            |
| O(3A) -Co-O(2)  | 163.26(8)  |
| O(3A)-Co-N(1)   | 97.75(10)  |
| O(2)-Co-N(1)    | 96.11(9)   |
| O(3A) -Co-O(4D) | 90.79(9)   |
| O(2)-Co-O(4D)   | 93.81(9)   |
| N(1)-Co-O(4D)   | 108.00(9)  |
| O(3A)-Co-O(5A)  | 86.01(8)   |
| O(2)-Co-O(5E)   | 84.90(8)   |
| N(1)-Co-O(5E)   | 88.94(9)   |
| O(4D)-Co-O(5E)  | 163.04(7)  |

---

Symmetry transformations used to generate equivalent atoms:

- (A)  $-x + 1$  ,  $-y + 1$  ,  $-z + 1$  (B)  $-x + 3/2$  ,  $-y + 3/2$  ,  $-z$   
(C)  $x - 1/2$  ,  $y + 1/2$  ,  $z$  (D)  $-x + 1/2$  ,  $-y + 3/2$  ,  $-z + 1$   
(E)  $x + 1/2$  ,  $y - 1/2$  ,  $z$

**Table S4.** Selected bond lengths (Å) and angles (°) for complex 4.

---

|                    |            |
|--------------------|------------|
| Co(1)-O(3)         | 1.933(4)   |
| Co(1)-O(12C)       | 1.974(4)   |
| Co(1)-O(6B)        | 1.989(4)   |
| Co(1)-N(1)         | 2.022(5)   |
| Co(2)-O(11C)       | 2.003(4)   |
| Co(2)-O(4)         | 2.063(4)   |
| Co(2)-O(8)         | 2.082(4)   |
| Co(2)-N(4A)        | 2.112(5)   |
| Co(2)-O(9)         | 2.184(4)   |
| Co(2)-O(6B)        | 2.301(4)   |
|                    |            |
| O(3)-Co(1)-O(12C)  | 105.42(16) |
| O(3)-Co(1)-O(6B)   | 121.87(16) |
| O(12C)-Co(1)-O(6B) | 101.60(15) |
| O(3)-Co(1)-N(1)    | 110.37(17) |
| O(12C)-Co(1)-N(1)  | 104.35(17) |
| O(6B)-Co(1)-N(1)   | 111.19(17) |
| O(11C)-Co(2)-O(4)  | 101.33(16) |
| O(11C)-Co(2)-O(8)  | 154.97(15) |
| O(4)-Co(2)-O(8)    | 103.20(14) |
| O(11C)-Co(2)-N(4A) | 95.48(17)  |
| O(4)-Co(2)-N(4A)   | 87.66(16)  |
| O(8)-Co(2)-N(4A)   | 90.45(16)  |
| O(11C)-Co(2)-O(9)  | 93.74(15)  |
| O(4)-Co(2)-O(9)    | 164.93(15) |
| O(8)-Co(2)-O(9)    | 61.78(14)  |
| N(4A)-Co(2)-O(9)   | 91.04(16)  |
| O(11C)-Co(2)-O(6B) | 86.70(14)  |
| O(4)-Co(2)-O(6B)   | 96.43(14)  |
| O(8)-Co(2)-O(6B)   | 85.68(14)  |
| N(4S)-Co(2)-O(6B)  | 174.92(16) |
| O(9)-Co(2)-O(6B)   | 84.23(14)  |

---

Symmetry transformations used to generate equivalent atoms:

(A)  $x - 1, -y + 1/2, z - 3/2$  (B)  $-x + 1, y + 1/2, -z - 5/2$

(C)  $-x, y - 1/2, -z - 5/2$

**Table S5.** Selected bond lengths (Å) and angles (°) for complex **5**.

---

|                 |            |
|-----------------|------------|
| Co-N(4B)        | 2.084(5)   |
| Co-N(1)         | 2.089(5)   |
| Co-O(5A)        | 2.134(4)   |
| Co-O(4)         | 2.143(4)   |
| Co-O(3)         | 2.166(4)   |
| Co-O(6A)        | 2.168(4)   |
| <br>            |            |
| N(4B) -Co-N(1)  | 99.1(2)    |
| N(4B) -Co-O(5A) | 95.71(18)  |
| N(1)-Co-O(5A)   | 92.88(18)  |
| N(4B)-Co-O(4)   | 93.25(18)  |
| N(1)-Co-O(4)    | 98.00(19)  |
| O(5A) -Co-O(4)  | 164.64(17) |
| N(4B)-Co-O(3)   | 151.97(18) |
| N(1)-Co-O(3)    | 94.46(18)  |
| O(5A)-Co-O(3)   | 108.04(17) |
| O(4)-Co-O(3)    | 60.46(16)  |
| N(4B)-Co-O(6A)  | 91.36(18)  |
| N(1)-Co-O(6A)   | 152.88(18) |
| O(5A)-Co-O(6A)  | 61.04(16)  |
| O(4)-Co-O(6A)   | 106.36(16) |
| O(3)-Co-O(6A)   | 87.49(16)  |

---

Symmetry transformations used to generate equivalent atoms:

(A)  $x, y, z + 1$  (B)  $-x + 1/2, y - 1/2, -z + 1/2$

**Table S6.** Selected bond lengths (Å) and angles (°) for complex **6**.

---

|               |            |
|---------------|------------|
| Co-O(5C)      | 1.960(3)   |
| Co-O(3)       | 1.960(3)   |
| Co-N(1)       | 2.023(4)   |
| Co-N(3)       | 2.045(4)   |
| <br>          |            |
| O(5C)-Co-O(3) | 99.82(16)  |
| O(5C)-Co-N(1) | 117.79(16) |
| O(3)-Co-N(1)  | 113.37(15) |
| O(5C)-Co-N(3) | 97.96(15)  |
| O(3)-Co-N(3)  | 128.49(15) |
| N(1)-Co-N(3)  | 99.71(15)  |

---

Symmetry transformations used to generate equivalent atoms:

(A)  $-x + 3, -y + 1, -z + 4$  (B)  $-x + 4, -y + 1, -z + 2$  (C)  $x + 1, y, z + 1$
